# Supplementary material for: Combining an Hsp70 inhibitor with either an N- or C-terminal Hsp90 inhibitor produces mechanistically distinct phenotypes
Source: Royal Society of Chemistry journal article supplement (doi:10.1039/c5ob00147a), 2015-01-01
Supplement: c5ob00147a1.pdf [file c5ob00147a1.pdf]

## SUPPORTING INFORMATION

### Supplementary Figures

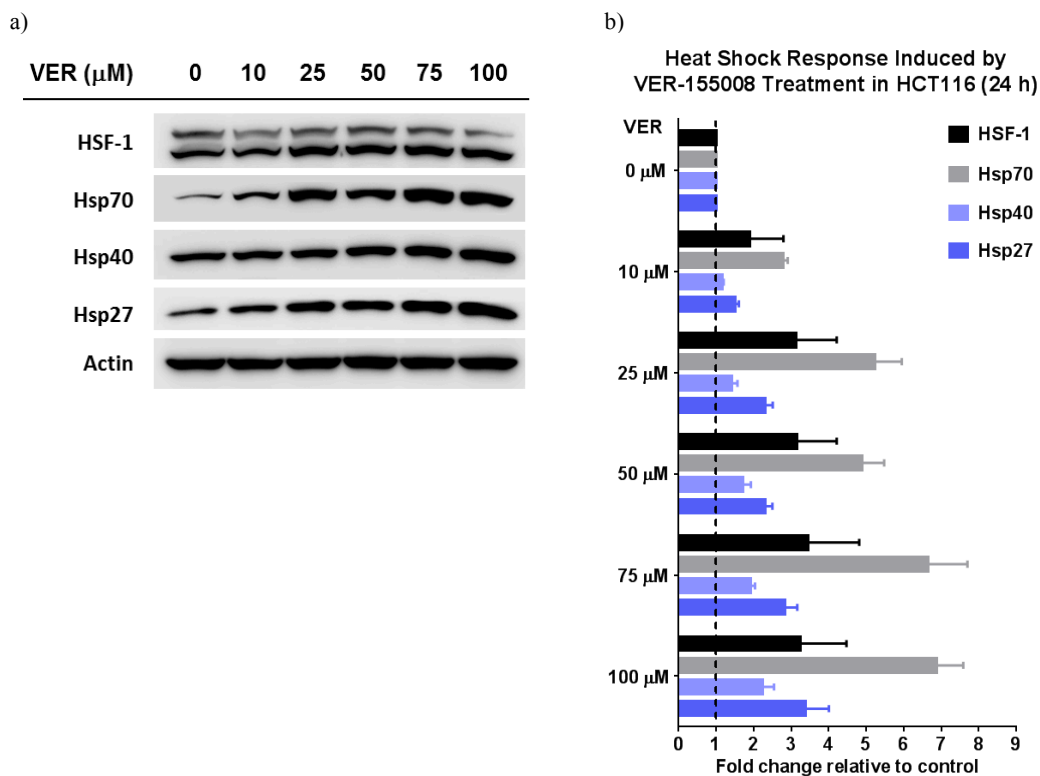

**Supplementary Figure 1.** Effect of VER-mediated Hsp70 inhibition on HSF-1 and HSP induction. (a) Immunoblot for HSF-1 and HSPs of interest in the lysate of HCT116 cells treated for 24 hrs with DMSO (control), or VER with indicated concentrations. All experiments were performed at least three times, and representative results are shown. (b) Immunoblot results are plotted as fold change relative to DMSO control. All values are average  $\pm$  s.e.m. from three independent experiments. Actin was used as the protein loading control.
